# Supplementary figures and images for: Inhibition of Fatty Acid Amide Hydrolase (FAAH) Regulates NF-kb Pathways Reducing Bleomycin-Induced Chronic Lung Inflammation and Pulmonary Fibrosis
Source: MDPI journal article supplement (doi:10.3390/ijms241210125), 2023-06-14

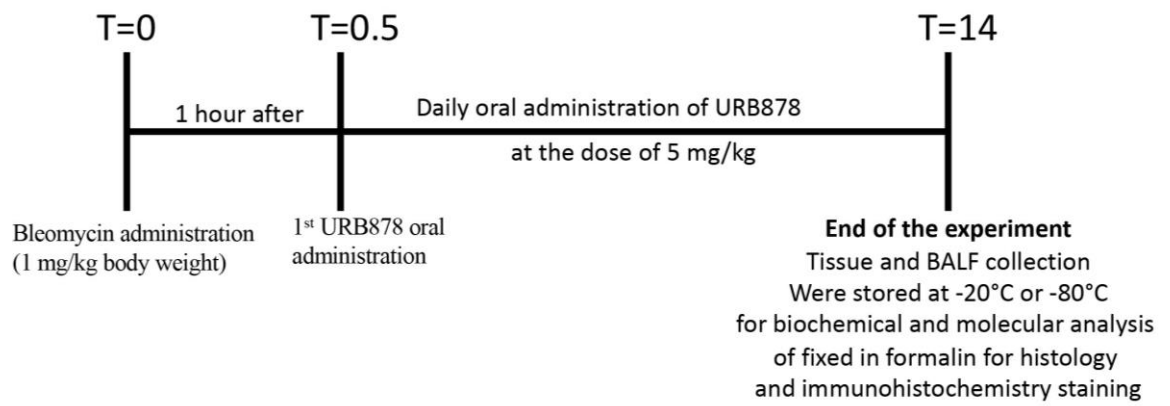

Figure S1. Experimental design of bleomycin induced chronic lung injury.

Supplement: s1 [file s1]
